# Supplementary material for: LIN28B gene polymorphisms modify hepatoblastoma susceptibility in Chinese children
Source: PubMed Central journal article supplement (PMC7150445; doi:10.7150/jca.42798), 2020-03-15
Supplement: jcav11p3512s1.pdf [file jcav11p3512s1.pdf]

**Supplemental Table 1.** Frequency distribution of selected variables in hepatoblastoma patients and controls

| Variables        | Cases (N=275) |       | Controls (N=1018) |       | <i>P</i> <sup>a</sup> |
|------------------|---------------|-------|-------------------|-------|-----------------------|
|                  | No.           | %     | No.               | %     |                       |
| Age range, month | 0.10-149.97   |       | 0.033-156.00      |       | 0.365 <sup>b</sup>    |
| Mean ± SD        | 23.81 ± 25.82 |       | 25.10 ± 19.35     |       |                       |
| <17              | 148           | 53.82 | 459               | 45.09 |                       |
| ≥17              | 127           | 46.18 | 559               | 54.91 |                       |
| Gender           |               |       |                   |       | 0.589                 |
| Female           | 113           | 41.09 | 400               | 39.29 |                       |
| Male             | 162           | 58.91 | 618               | 60.71 |                       |
| Clinical stages  |               |       |                   |       |                       |
| I                | 93            | 33.82 |                   |       |                       |
| II               | 49            | 17.82 |                   |       |                       |
| III              | 51            | 18.55 |                   |       |                       |
| IV               | 20            | 7.27  |                   |       |                       |
| NA               | 62            | 22.55 |                   |       |                       |

SD, standard deviation, NA, not available.

<sup>a</sup> Two-sided  $\chi^2$  test for distributions between hepatoblastoma patients and cancer-free controls.

<sup>b</sup> T-test for age distribution between hepatoblastoma patients and cancer-free controls.
